# Supplementary material for: Targeting PD-L1 in non-small cell lung cancer using CAR T cells
Source: PubMed Central journal article supplement (PMC7426958; doi:10.1038/s41389-020-00257-z), 2020-08-13
Supplement: 41389_2020_257_MOESM1_ESM.pdf [file 41389_2020_257_MOESM1_ESM.pdf]

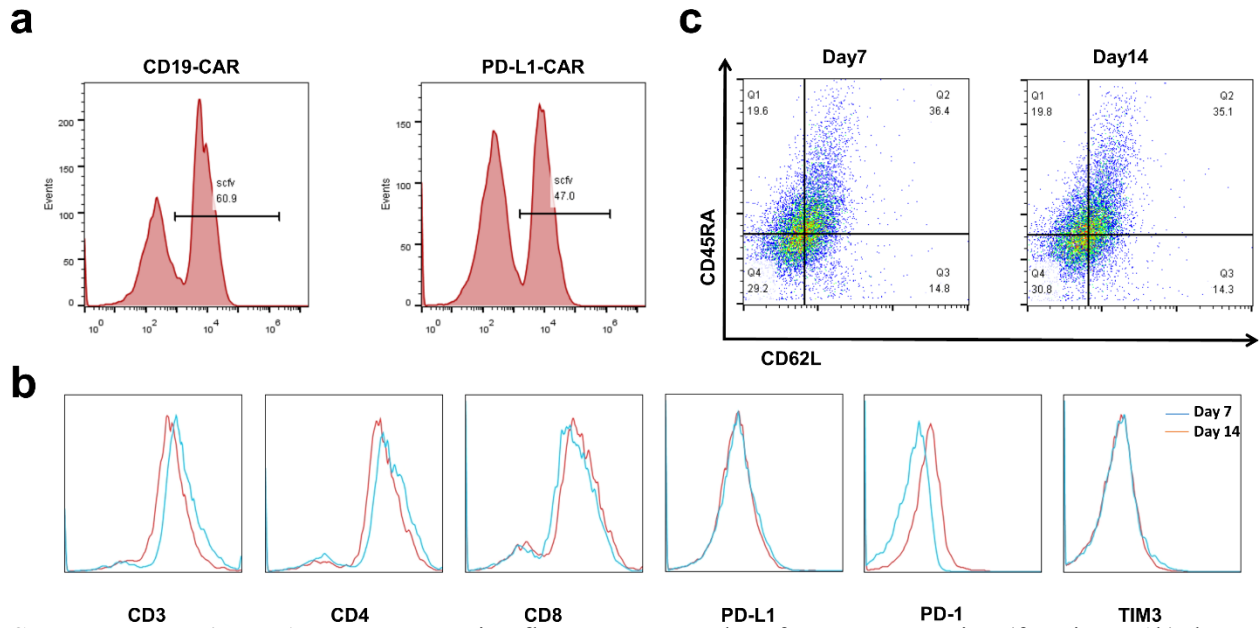

**Supplemental Figure 1.** a. Representative flow cytometry plot of CARs expression (for Figure 1b). b. Representative flow cytometry of PD-L1-CAR T cells that were positive for CD3, CD4, CD8, PD-1, PD-L1, and TIM3 on day 7 and 14 (for Figure 1e). c. Representative flow cytometry of PD-L1-CAR T cells that were positive for memory cell markers CD62L and CD45RA on day 7 and 14 (for Figure 1f).

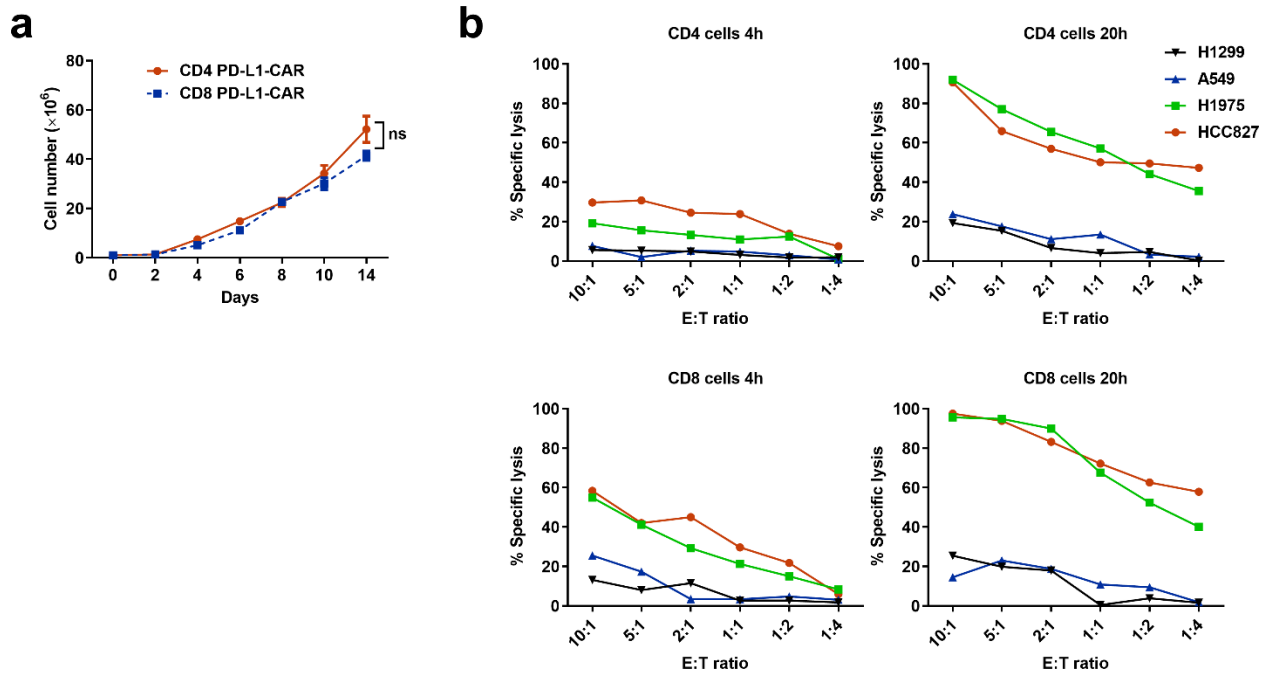

**Supplemental Figure 2.** CD4/CD8 PD-L1-CAR T cells lyse NSCLC cells in a PD-L1-dependent manner. a. Expansion after 14 d of CD4 and CD8 T cells transduced with CD19-CAR and PD-L1-CAR *in vitro*. b. Cytotoxic activity of CD4 and CD8 PD-L1-CAR T cells after 4 and 20 h of co-culture with NSCLC cell lines. Data represented technical triplicates using T cells from one donor and were displayed as mean  $\pm$  SEM. ns = not significant.

**a**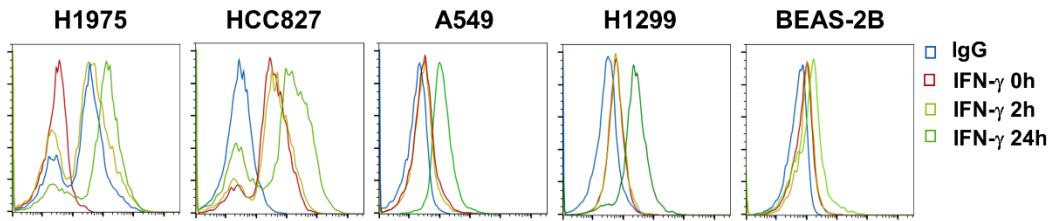**b**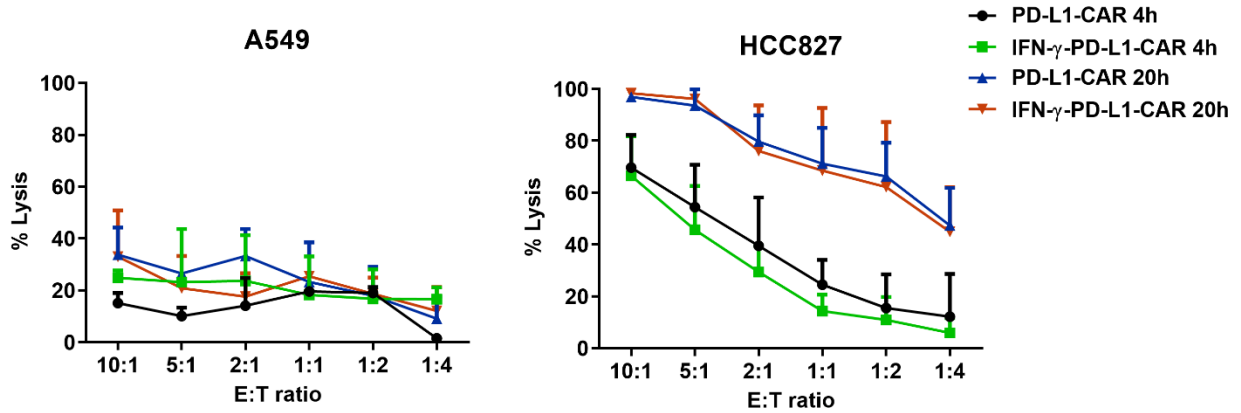

**Supplemental Figure 3.** Evaluation of IFN- $\gamma$  with PD-L1-CAR T cells against NSCLC cells. a. PD-L1 expression was measured by flow cytometry in cell lines 2 or 24 h after treatment with 5 ng/mL IFN- $\gamma$ . b. The anti-tumor efficacy of PD-L1-CAR T cells treated with IFN- $\gamma$  at different effector (E): target (T) ratios.

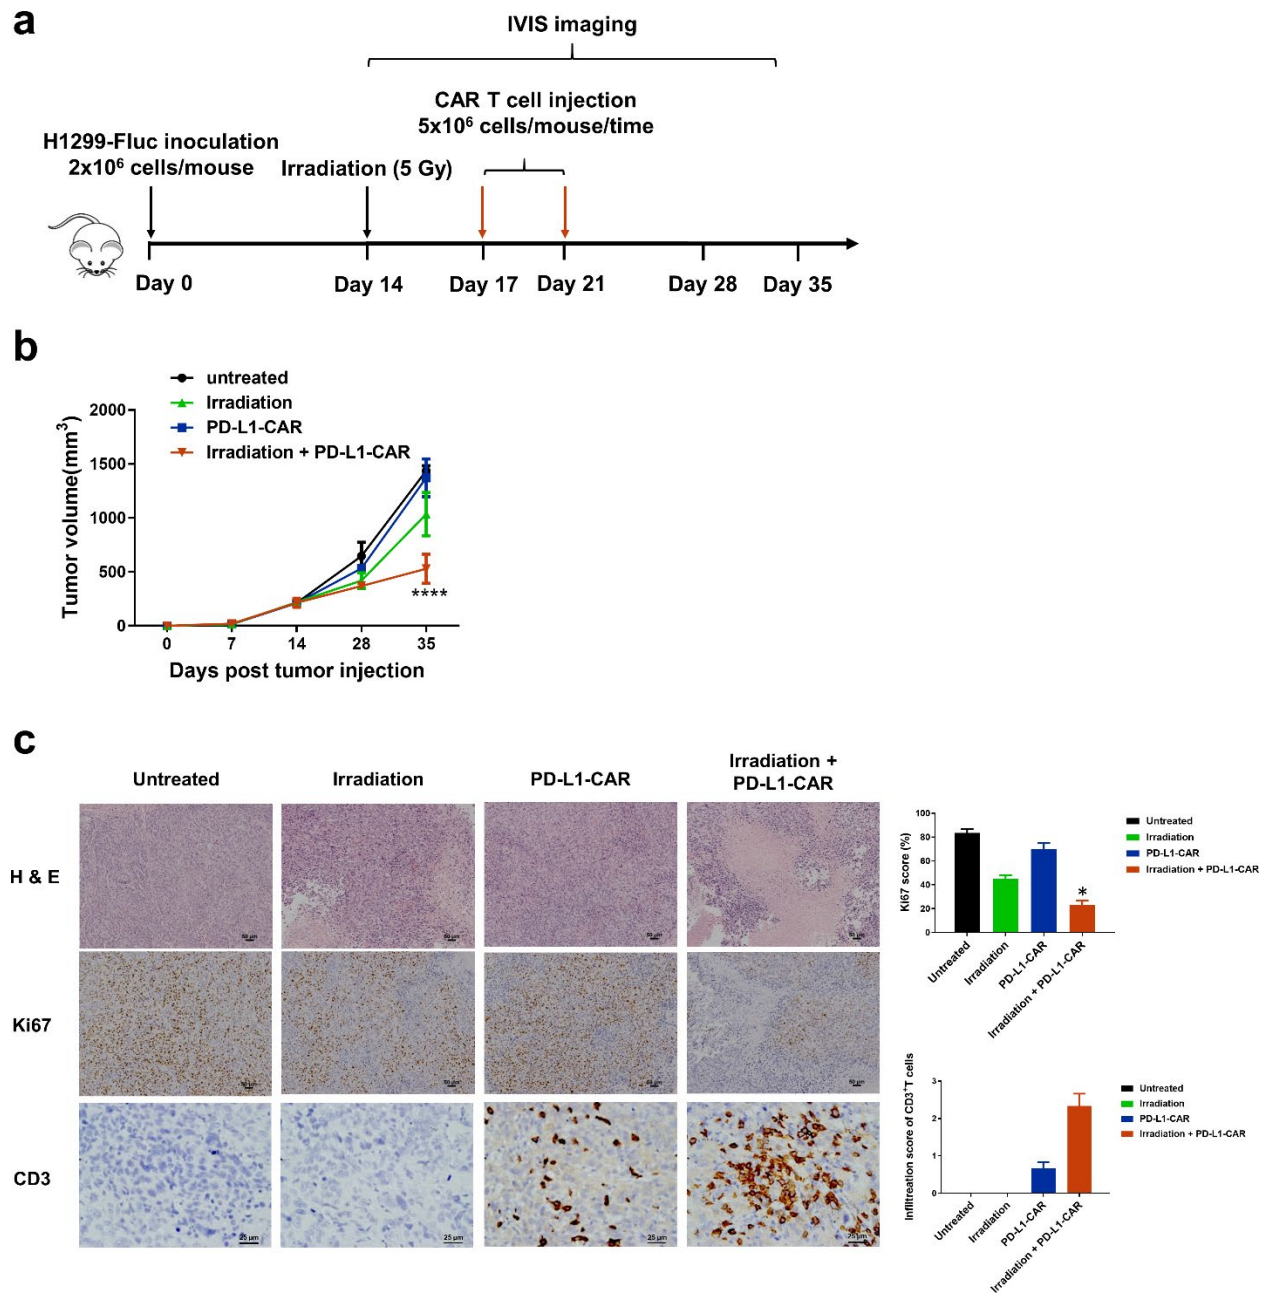

**Supplemental Figure 4.** Synergistic efficacy of irradiation and PD-L1-CAR T-cell therapy in the H1299 xenograft model. a. Experimental design of tumor cell xenograft model treated with CAR T cells or irradiation. b. Tumor volume in each group of mice (n=3 mice per group). c. H & E staining of the indicated organs. Scale bars, 50  $\mu$ m. Representative IHC of NSCLC tumors from each group stained for Ki67 and CD3. Scale bars, 50  $\mu$ m or 25  $\mu$ m as indicated. \*\*\*\*  $p \leq 0.0001$ .
